# Supplementary material
Source: HighWire-hosted journal article supplement (doi:10.1101/rna.079097.122)
Supplement: Supplemental_Figure_Legends.docx [file Supplemental_Figure_Legends.docx]

**Supplemental Figure 1. Characterization of newly synthesized proteins in mitochondria**

(A) Methionine analogs and click chemistry-compatible ligands used for metabolic labeling of mitochondrial nascent proteins.

(B) Schematic representations of on-gel mito-FUNCAT and *in situ* mito-FUNCAT procedures.

(C) Representative gel images (n = 3) of total and mitochondrial nascent proteins. HEK293 cells were incubated with HPG in the presence of cytosolic translation inhibitors, ANS, CHX, or EME. Infrared (IR)-800 dye was conjugated to HPG-containing nascent proteins via a click reaction. Total protein was stained with CBB.

(D) The assignment of 13 mitochondrial genome-encoded proteins to proteins detected with on-gel mito-FUNCAT. We note that because of its hydrophobic nature, CO1, which was predicted to be 57 kDa, aberrantly migrated around the 37-kDa region.

(E) Mitochondrial nascent proteins (n = 2) were labeled with AHA or HPG and with azide-IR800 or alkyne-IR800, respectively. CAP was used to block mitochondrial translation and to monitor the background signal.

(F) Time course experiments of on-gel mito-FUNCAT for the indicated cell lines. The mean value after 3-h incubation in C2C12 cells was set to 1. The mean (point) with SD (error bar) of three replicates is shown.

**Supplemental Figure 2. Mito-FUNCAT-FACS signals normalized by MitoTracker**

(A-D) The same experiments as in Fig. 2B-E but the mitochondria mass was measured and normalized by MitoTracker Deep Red. Data from 1 × 104 cells are shown. Representative data (n = 5) are shown.

**Supplemental Figure 3. Normalization of mito-FUNCAT-FACS signals in bezafibrate treatment by MitoTracker**

(A-C) The same experiments as in Fig. 3B-D but the mitochondria mass was measured and normalized by MitoTracker Deep Red. Data from 1 × 104 cells are shown. The dashed line indicates the mean of the distribution. Significance was determined by the Mann–Whitney *U* test (two-tailed). Representative data (n = 2) are shown. In the bar graphs, data from two replicates (mean of 1 × 104 cells, relative to DMSO treatment) (points) and the mean (bar) are shown.

**Supplemental Figure 4. Characterization of gated cells in mito-FUNCAT-FACS**

(A-F) Distributions of forward scatter (FSC) and side scatter (SSC) of cells analyzed in mito-FUNCAT-FACS (in Figs. 2-4 and Supplemental Figs. S2-3).
