# Supplementary material
Source: HighWire-hosted journal article supplement (doi:10.1101/rna.079097.122)

### A TOM20-AF647 normalization

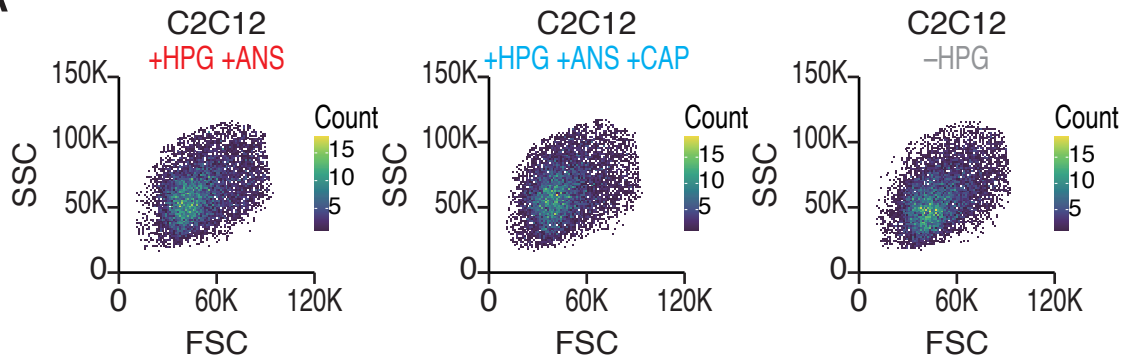

### B MitoTracker normalization

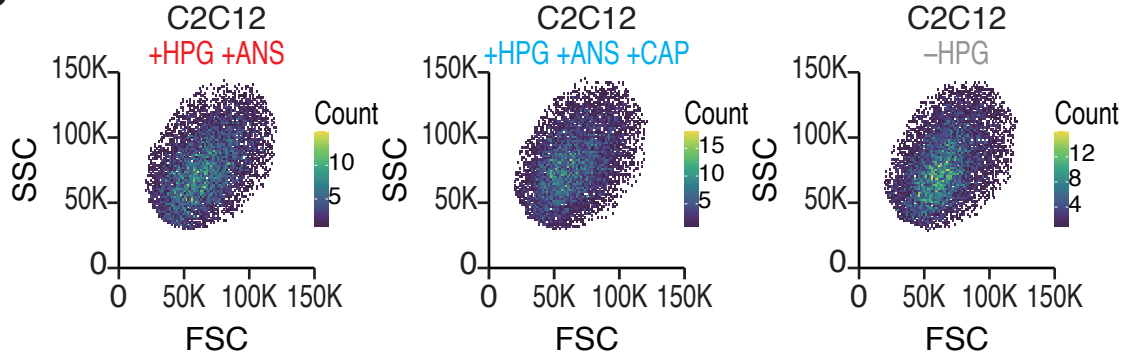

### C TOM20-AF647 normalization

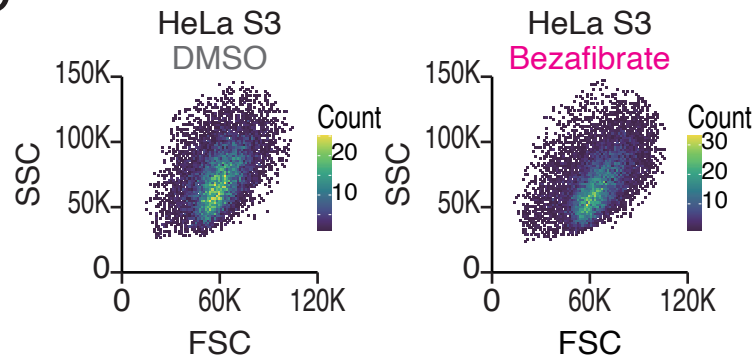

### D MitoTracker normalization

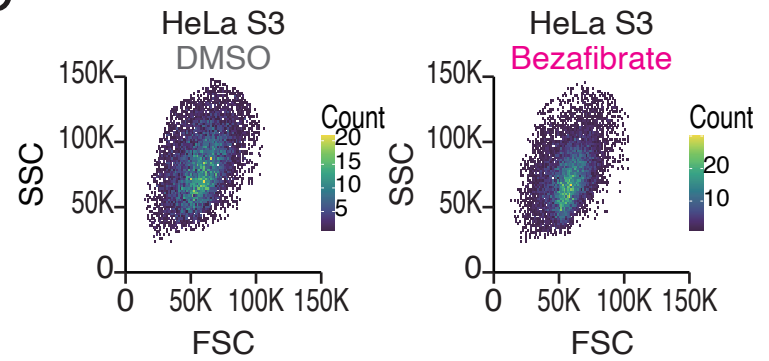

### E TOM20-AF647 normalization

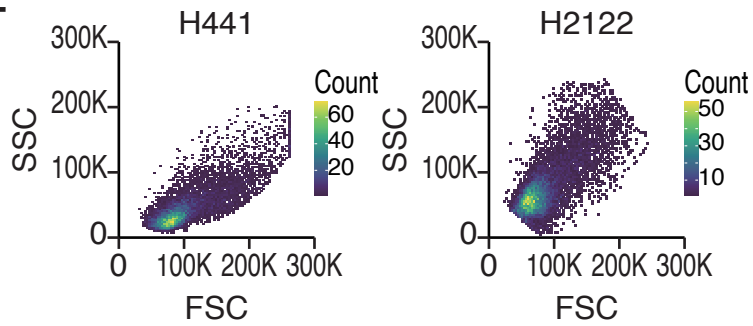

### F TOM20-AF647 normalization

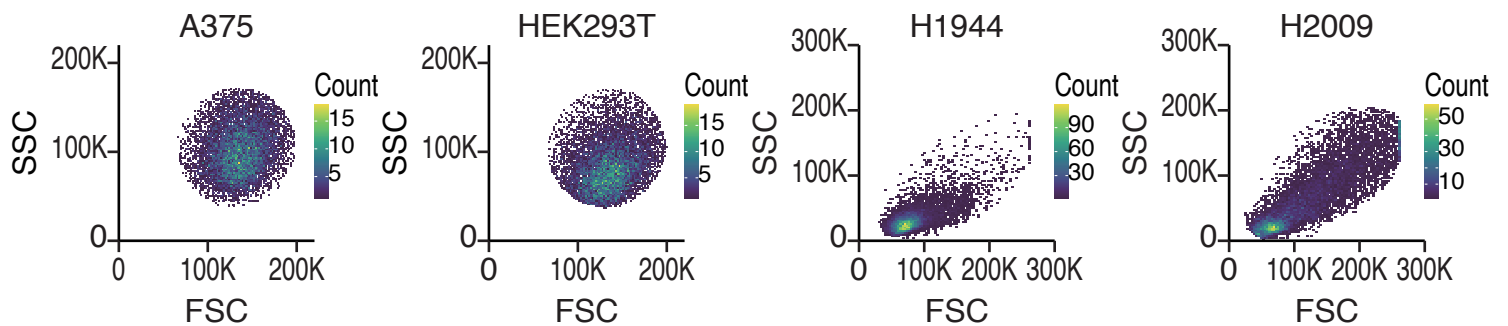

Supplement: Supplemental_FigureS4.pdf [file Supplemental_FigureS4.pdf]
