# Supplementary material
Source: HighWire-hosted journal article supplement (doi:10.1101/rna.079097.122)

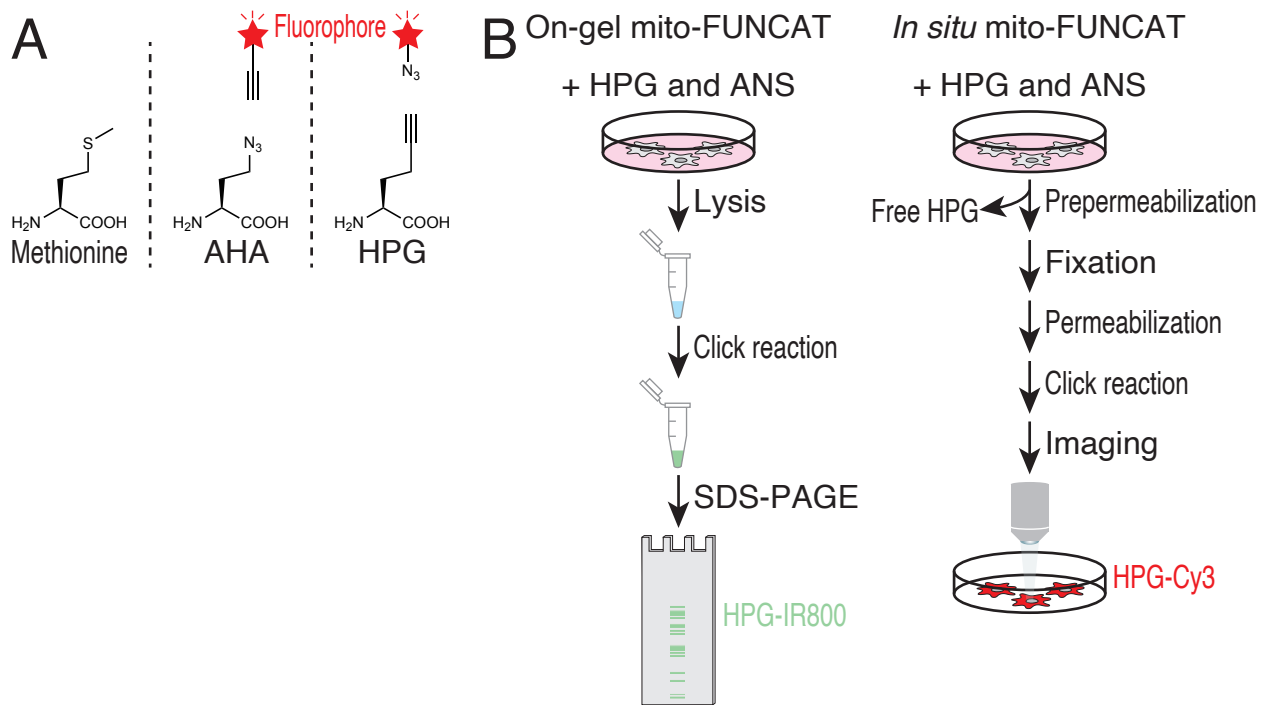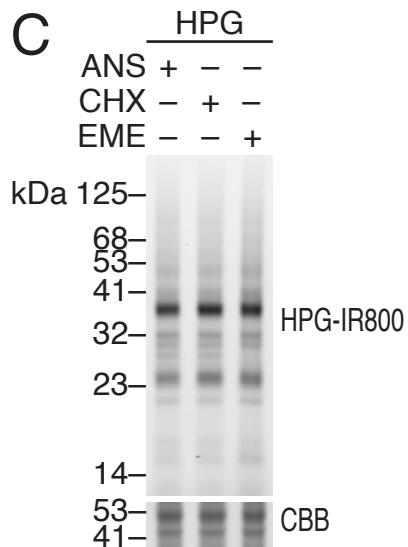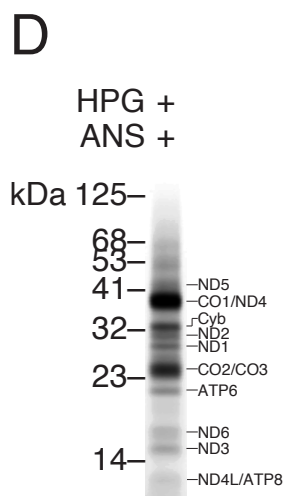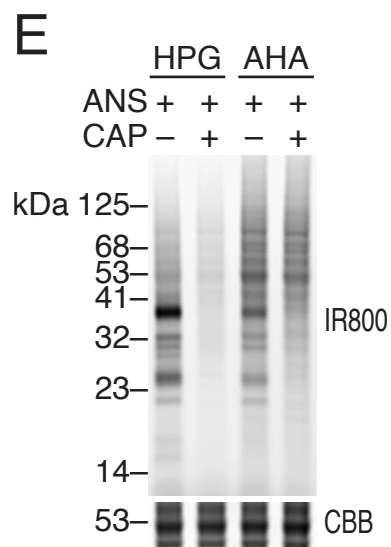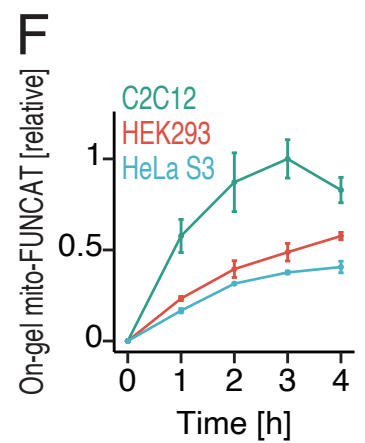

Supplement: Supplemental_FigureS1.pdf [file Supplemental_FigureS1.pdf]

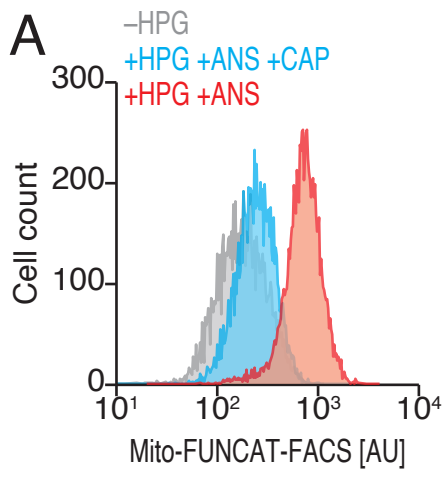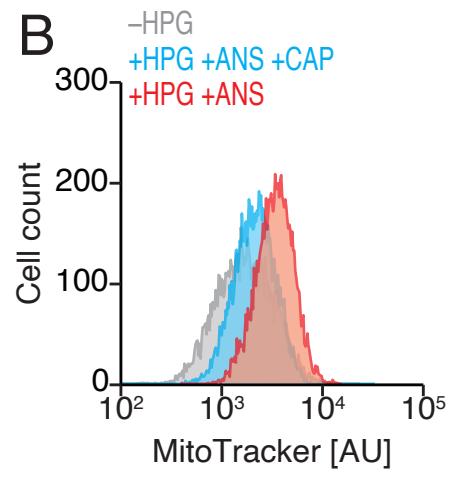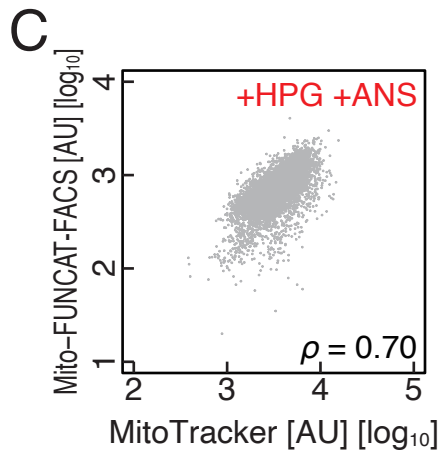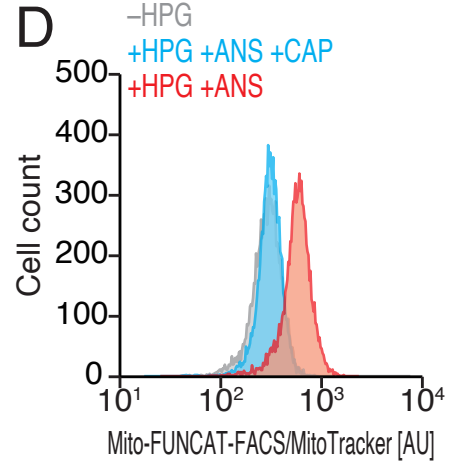

Supplement: Supplemental_FigureS2.pdf [file Supplemental_FigureS2.pdf]

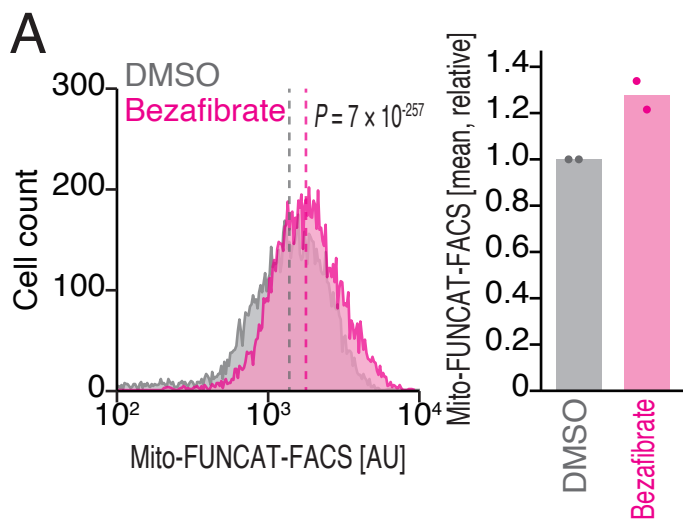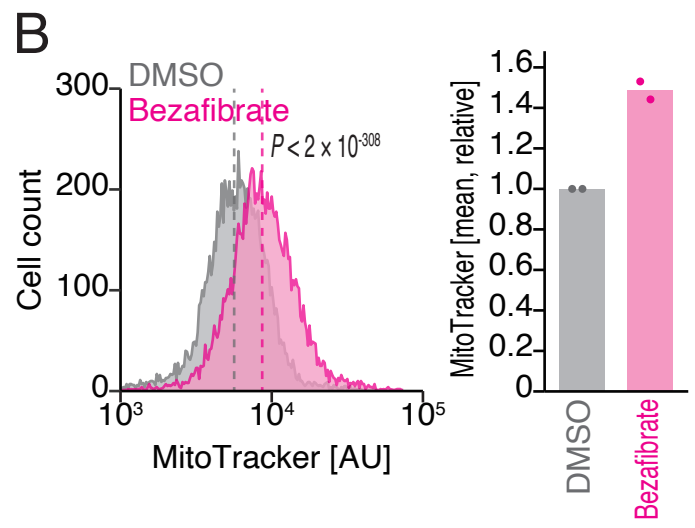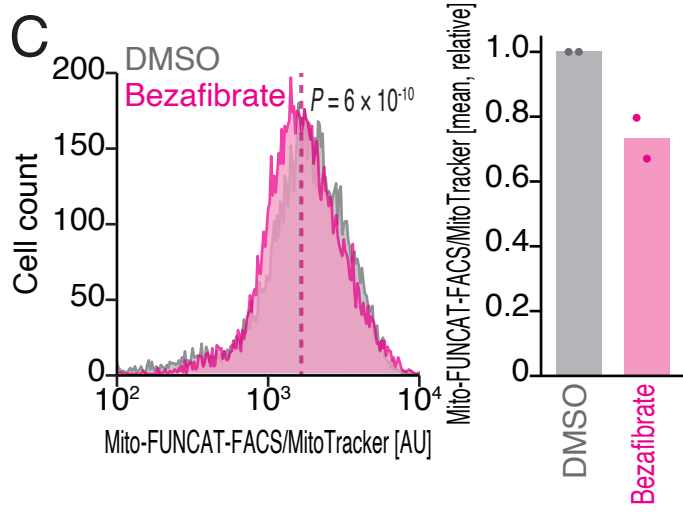

Supplement: Supplemental_FigureS3.pdf [file Supplemental_FigureS3.pdf]
